# Supplementary material
Source: PubMed Central journal article supplement (PMC6584269)
Supplement: jamainternmed-178-1390-s001.pdf [file jamainternmed-178-1390-s001.pdf]

## Supplementary Online Content

Stelfox HT, Soo A, Niven DJ, et al. Assessment of the Safety of Discharging Select Patients Directly Home From the Intensive Care Unit: A Multicenter Population-Based Cohort Study. *JAMA Intern Med*. Published online August 20, 2018. doi:10.1001/jamainternmed.2018.3675

**eFigure.** Proportion of Patients Discharged Directly Home from ICU by Hospital

**eTable 1.** Most Frequent ICU Admission Diagnoses for Patients Discharged Directly Home from ICU

**eTable 2.** Multivariable Logistic Regression Analysis of Patient and Hospital Characteristics Associated with Patients Discharged Directly Home

**eTable 3.** Cox Proportional-Hazard Analysis of Healthcare Utilization after Hospital Discharge Among Subgroups of Patients with the Most Common ICU Admission Diagnoses

**eTable 4.** Univariable Cox Proportional-Hazard Analysis of Risk Factors for Joint Outcome of Hospital Readmission or Emergency Department Visit within 30 days of Patient Discharge Directly Home from ICU

This supplementary material has been provided by the authors to give readers additional information about their work.

**eFigure. Proportion of Patients Discharged Directly Home from ICU by Hospital<sup>a</sup>**

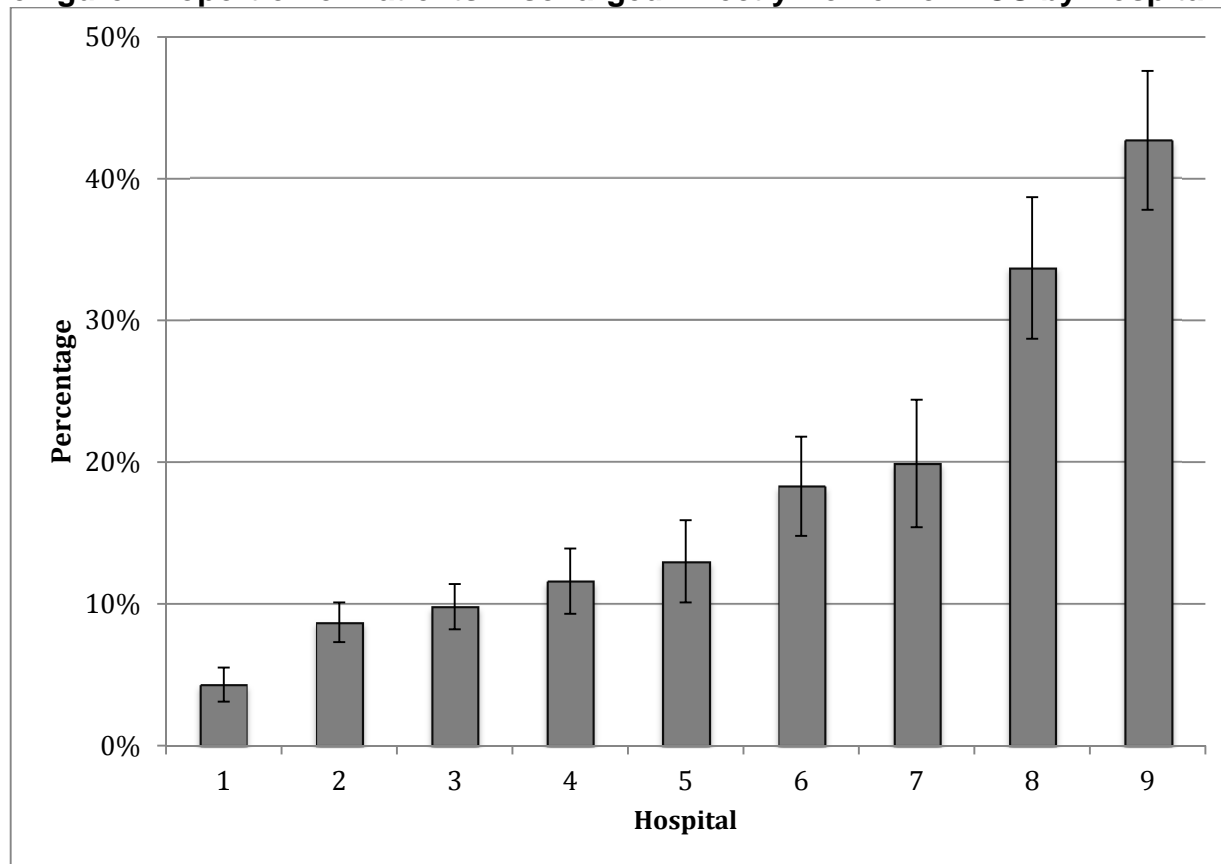

<sup>a</sup>Error bars represent 95% confidence intervals

**eTable 1. Most Frequent ICU Admission Diagnoses for Patients Discharged Directly Home from ICU.**

| <b>Admission Diagnosis<sup>a</sup></b>              | <b>Number (percent)<br/>N=911<sup>b</sup></b> |
|-----------------------------------------------------|-----------------------------------------------|
| Overdose                                            | 208 (23)                                      |
| Pneumonia                                           | 104 (11)                                      |
| Trauma or orthopedic injury                         | 79 (9)                                        |
| Other respiratory problems                          | 55 (6)                                        |
| Sepsis (non-pulmonary)                              | 52 (6)                                        |
| Other Medical or neurological problems              | 48 (5)                                        |
| Gastrointestinal problems                           | 45 (5)                                        |
| Airway obstruction                                  | 40 (4)                                        |
| Seizures                                            | 39 (4)                                        |
| Obstructive lung disease                            | 38 (4)                                        |
| Metabolic coma                                      | 35 (4)                                        |
| Cardiovascular problems                             | 25 (3)                                        |
| Neuromuscular respiratory failure                   | 24 (3)                                        |
| Cardiac arrest                                      | 15 (2)                                        |
| Complications of diabetes                           | 15 (2)                                        |
| Venous thromboembolism                              | 15 (2)                                        |
| Withdrawal from substance dependence                | 13 (1)                                        |
| Anaphylaxis                                         | 12 (1)                                        |
| Congestive heart failure                            | 12 (1)                                        |
| Renal failure                                       | 12 (1)                                        |
| Complications of pregnancy or genitourinary surgery | 9 (1)                                         |
| Cancer                                              | 8 (1)                                         |
| Encephalopathy                                      | 8 (1)                                         |

<sup>a</sup> Diagnoses represent collations of APACHE IV ICU diagnoses on admission to ICU. The 24 admission diagnoses were aggregated into ten reasons for ICU admission for parsimonious presentation in Table 1.

<sup>b</sup> Admission diagnosis missing for 11 patients

**eTable 2. Multivariable Logistic Regression Analysis of Patient and Hospital Characteristics Associated with Patients Discharged Directly Home<sup>a</sup>**

| Characteristics                                             | Odds Ratio <sup>b</sup><br>(95% CI) | P-Value |
|-------------------------------------------------------------|-------------------------------------|---------|
| Age                                                         | 0.98 (0.98-0.99)                    | <0.001  |
| Charlson score                                              | 0.88 (0.84-0.93)                    | <0.001  |
| ICU admission diagnosis                                     |                                     |         |
| Overdose/withdrawal/seizures/metabolic coma                 | 1.94 (1.48-2.54)                    | <0.001  |
| Location before ICU admission                               |                                     |         |
| Emergency department                                        | 1.00 (reference group)              | -       |
| Operating room/recovery                                     | 0.32 (0.25-0.43)                    | <0.001  |
| Ward                                                        | 0.60 (0.46-0.78)                    | <0.001  |
| Other hospital                                              | 1.17 (0.85-1.61)                    | 0.32    |
| Admission APACHE II score                                   | 0.974 (0.949-0.995)                 | 0.02    |
| Admission SOFA score                                        | 0.93 (0.89-0.96)                    | <0.001  |
| Previous ICU admission during hospital admission            | 0.51 (0.29-0.90)                    | 0.02    |
| Invasive mechanical ventilation                             |                                     |         |
| None                                                        | 1.00 (reference group)              | -       |
| Duration < 48 hours                                         | 1.21 (1.02-1.44)                    | 0.03    |
| Duration ≥ 48 hours                                         | 0.72 (0.58-0.89)                    | 0.003   |
| Vasoactive medications received                             | 0.84 (0.70-1.02)                    | 0.08    |
| Discharge SOFA score                                        | 0.93 (0.89-0.98)                    | 0.005   |
| ICU Occupancy ≥ 80%                                         | 0.39 (0.33-0.45)                    | <0.001  |
| >24 hours in ICU after ready for ICU discharge <sup>c</sup> | 1.31 (1.06-1.62)                    | 0.01    |

<sup>a</sup> Variables with  $p < 0.2$  from univariate analyses in Table 1 were considered in model construction: age, Charlson score, ICU admission diagnosis, location before ICU admission, admission APACHE II score, admission SOFA score, previous ICU admission during hospital admission, invasive mechanical ventilation (none, duration < 48 hours, duration ≥ 48 hours), vasoactive medications received (y/n), renal replacement therapy (y/n), discharge SOFA score, teaching hospital, ≥600 hospital beds, ≥ 20 ICU beds, ≥1 ICU discharge directly home per week, ICU occupancy ≥ 80%, > 24 hours in ICU after ready for ICU discharge, ICU length of stay). Hospital length of stay and public community supports on hospital discharge were not considered in model construction as they maybe influenced by care provided after patient discharge from ICU.

<sup>b</sup> Reference group are patients discharged home via a hospital ward.

<sup>c</sup> Defined as time from when patient determined to be ready for ICU discharge to when patient left the ICU.

**eTable 3.** Cox Proportional-Hazard Analysis of Healthcare Utilization after Hospital Discharge in the Matched Cohort Among Subgroups of Patients with the Most Common ICU Admission Diagnoses<sup>a</sup>

| Measures <sup>b</sup>      | Hazard Ratio (95% CI) <sup>c</sup>                       |                   |                           |
|----------------------------|----------------------------------------------------------|-------------------|---------------------------|
|                            | Overdose, withdrawal, seizures or metabolic coma (n=480) | Pneumonia (n=197) | Respiratory other (n=228) |
| Hospital readmission       |                                                          |                   |                           |
| 30 days                    | 1.19 (0.86-1.65)                                         | 0.76 (0.33-1.75)  | 0.84 (0.27-2.62)          |
| 90 days                    | 0.94 (0.72-1.24)                                         | 0.75 (0.38-1.48)  | 0.70 (0.31-1.55)          |
| 365 days                   | 0.94 (0.73-1.21)                                         | 0.80 (0.46-1.37)  | 0.76 (0.44-1.30)          |
| Emergency department visit |                                                          |                   |                           |
| 30 days                    | 1.14 (0.94-1.39)                                         | 1.14 (0.66-1.95)  | 1.03 (0.55-1.94)          |
| 90 days                    | 1.09 (0.95-1.26)                                         | 1.07 (0.80-1.44)  | 0.86 (0.52-1.41)          |
| 365 days                   | 0.97 (0.85-1.11)                                         | 1.08 (0.76-1.52)  | 0.92 (0.62-1.37)          |

<sup>a</sup> Analyses restricted to the three most common diagnostic groups for patients discharged directly home.

<sup>b</sup> Modeling not done for mortality due to small number of deaths in subgroups.

<sup>c</sup> Reference group are patients discharged home via the hospital ward.

**eTable 4. Univariable Cox Proportional-Hazard Analysis of Risk Factors for Joint Outcome of Hospital Readmission or Emergency Department Visit within 30 days of Patient Discharge Directly Home from ICU<sup>a,b</sup>**

| Characteristic                                                     | Hospital Readmission or Emergency Department Visit |               |                          |         |
|--------------------------------------------------------------------|----------------------------------------------------|---------------|--------------------------|---------|
|                                                                    | Yes<br>(n=227)                                     | No<br>(n=695) | Hazard Ratio<br>(95% CI) | P-Value |
| <b>Patient Characteristics on Admission to ICU</b>                 |                                                    |               |                          |         |
| Female                                                             | 94 (41)                                            | 299 (43)      | 0.93 (0.79-1.09)         | 0.36    |
| Age, median (IQR)                                                  | 44 (31-57)                                         | 48 (32-60)    | 0.99 (0.99-1.00)         | 0.02    |
| Charlson score                                                     | 0 (0-1)                                            | 0 (0-1)       | 0.93 (0.86-1.01)         | 0.07    |
| <b>Admission diagnosis<sup>c</sup></b>                             |                                                    |               |                          |         |
| Overdose/withdrawal/seizures/metabolic coma                        | 87 (38)                                            | 208 (30)      | 1.36 (1.10-1.69)         | 0.005   |
| Pneumonia                                                          | 26 (12)                                            | 78 (11)       | 1.01 (0.82-1.24)         | 0.95    |
| Respiratory other                                                  | 27 (12)                                            | 106 (16)      | 0.75 (0.49-1.14)         | 0.17    |
| Medical or neurological other                                      | 22 (10)                                            | 85 (12)       | 0.80 (0.57-1.12)         | 0.19    |
| Trauma/Orthopedic                                                  | 21 (9)                                             | 58 (9)        | 1.14 (0.79-1.65)         | 0.49    |
| Cardiovascular                                                     | 17 (8)                                             | 50 (7)        | 1.03 (0.68-1.54)         | 0.90    |
| Sepsis (non-pulmonary)                                             | 13 (6)                                             | 39 (6)        | 1.00 (0.58-1.74)         | 1.00    |
| Gastrointestinal                                                   | 7 (3)                                              | 38 (6)        | 0.58 (0.32-1.07)         | 0.08    |
| Pregnancy or Genitourinary                                         | 5 (2)                                              | 16 (2)        | 0.97 (0.47-2.00)         | 0.94    |
| Malignancy                                                         | 1 (0)                                              | 7 (1)         | 0.46 (0.10-2.09)         | 0.32    |
| <b>Location before ICU admission<sup>d</sup></b>                   |                                                    |               |                          |         |
| Emergency department                                               | 150 (66)                                           | 457 (66)      | 1.00                     | -       |
| Operating room/recovery                                            | 18 (8)                                             | 80 (12)       | 0.72 (0.57-0.91)         | 0.006   |
| Ward                                                               | 40 (18)                                            | 120 (17)      | 1.02 (0.84-1.23)         | 0.14    |
| Other hospital                                                     | 18 (8)                                             | 37 (5)        | 1.48 (0.88-2.51)         | 0.86    |
| APACHE II score, median (IQR)                                      | 15 (10-21)                                         | 15 (9-20)     | 1.01 (0.99-1.02)         | 0.35    |
| SOFA score, median (IQR)                                           | 5 (3-8)                                            | 5 (3-7)       | 1.05 (1.01-1.08)         | 0.01    |
| <b>Interventions Received in ICU</b>                               |                                                    |               |                          |         |
| Non-invasive mechanical ventilation                                | 18 (8)                                             | 95 (14)       | 0.58 (0.29-1.16)         | 0.13    |
| <b>Invasive mechanical ventilation</b>                             |                                                    |               |                          |         |
| None                                                               | 90 (40)                                            | 318 (46)      | 1.00                     | -       |
| Duration < 48 hrs                                                  | 97 (43)                                            | 292 (42)      | 1.15 (0.98-1.35)         | 0.09    |
| Duration ≥ 48 hrs                                                  | 40 (18)                                            | 85 (12)       | 1.53 (1.18-1.98)         | 0.001   |
| Vasoactive medications                                             | 48 (21)                                            | 128 (18)      | 1.14 (0.88-1.49)         | 0.33    |
| Renal replacement therapy                                          | 3 (1)                                              | 6 (1)         | 1.33 (0.43-4.11)         | 0.62    |
| <b>Patient Characteristics on Discharge from ICU</b>               |                                                    |               |                          |         |
| SOFA score, median (IQR) <sup>e</sup>                              | 2 (2-5)                                            | 2 (2-5)       | 0.99 (0.91-1.07)         | 0.73    |
| <b>Hospital Characteristics</b>                                    |                                                    |               |                          |         |
| Teaching hospital                                                  | 170 (75)                                           | 522 (75)      | 0.98 (0.85-1.14)         | 0.82    |
| ≥ 600 Hospital beds                                                | 109 (48)                                           | 289 (42)      | 1.26 (1.09-1.45)         | 0.002   |
| ≥ 20 ICU beds                                                      | 91 (40)                                            | 235 (34)      | 1.26 (1.10-1.45)         | <0.001  |
| > 1 ICU direct home discharges per week                            | 146 (64)                                           | 418 (60)      | 1.17 (0.99-1.39)         | 0.06    |
| ICU occupancy ≥ 80% <sup>f</sup>                                   | 143 (63)                                           | 416 (60)      | 1.13 (0.93-1.37)         | 0.23    |
| > 24 hours in ICU after ready for ICU discharge <sup>g</sup>       | 83 (37)                                            | 270 (39)      | 0.90 (0.74-1.10)         | 0.30    |
| ICU length of stay (days), median (IQR)                            | 2.8 (1.5-5.2)                                      | 3.0 (1.7-5.7) | 1.00 (0.98-1.02)         | 0.75    |
| <b>Public community supports on hospital discharge<sup>h</sup></b> |                                                    |               |                          |         |
| Without community support services                                 | 186 (82)                                           | 619 (89)      | 1.00                     | -       |
| With community support services                                    | 18 (8)                                             | 41 (6)        | 1.41 (0.90-2.20)         | 0.14    |
| Left against medical advice                                        | 23 (10)                                            | 35 (5)        | 1.97 (1.22-3.19)         | 0.006   |

<sup>a</sup> Analyses limited to only those patients discharged directly home ICU

<sup>b</sup> Data presented as number (percent) unless otherwise indicated.

<sup>c</sup> Data missing for 11 patients

<sup>d</sup> Data missing for 2 patients

<sup>e</sup> SOFA score calculated using data from the patient's last day in ICU

<sup>f</sup> Percent of ICU beds occupied by patients at time of patient discharge from ICU

<sup>g</sup> Defined as the number of hours from when a service accepted the patient in transfer from the ICU to when the patient left the ICU. Data was missing for 333 patients and assumed to represent no delay.

<sup>h</sup> Defined as personal or health care services for patients living in a private residential setting that are covered by the health insurance system (e.g., home care nurse visits)
